# Supplementary material for: Silk fibroin-derived peptide directed silver nanoclusters for cell imaging
Source: Royal Society of Chemistry journal article supplement (doi:10.1039/c8ra04607g), 2018-01-01
Supplement: c8ra04607g1.pdf [file c8ra04607g1.pdf]

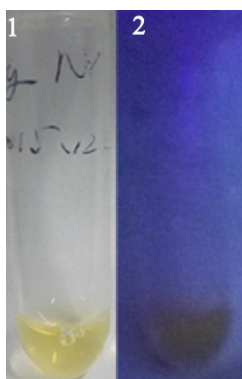

**Figure. S1** Photographs of lyophilized CSH-Ag NCs solution under visible light (1) and UV light (2).

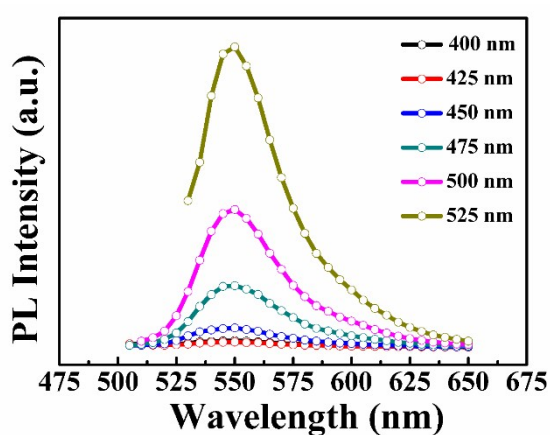

**Figure S2.** The excitation-independent PL spectrum of CSH-Ag NCs.

### The quantum yield (QY) of the CSH-Ag NCs

The quantum yield (QY) of the CSH-Ag NCs was measured at 1.1% using a 405 nm Xe laser and calibrated with Rhodamin 6G (Sigma 252433, Dye Content: 99%). According the emission peak area and absorbance of CSH-Ag NCs and Rhodamin 6G, the QY of the CSH-Ag NCs could be calculated from Equation 1.

$$\phi_{sample} = \phi_{ref} \times \frac{F_{sample}}{F_{ref}} \times \frac{A_{ref}}{A_{sample}}$$

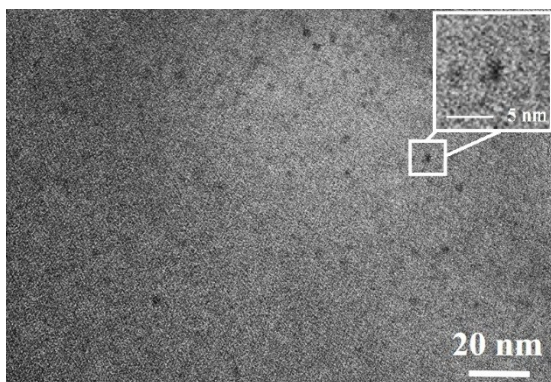

**Figure S3.** High resolution transmission electron microscopy (HRTEM) images showed the mean size of Ag NCs at two scale.

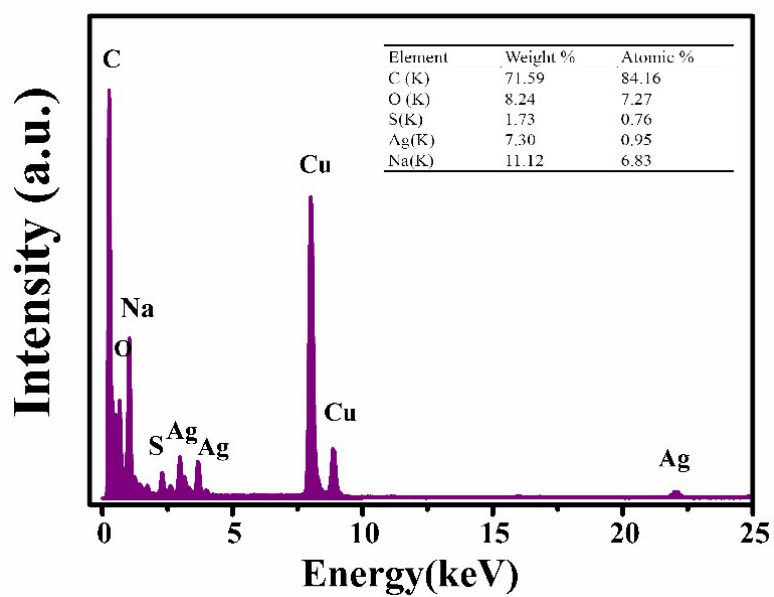

**Figure S4.** The EDAX spectrum of the Ag cluster along with the quantification data.

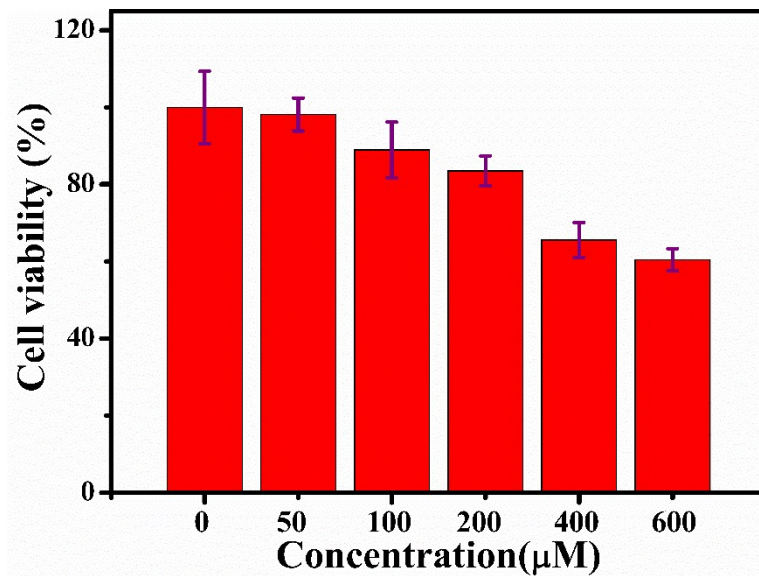

**Figure. S5** Viability of MC-3T3 cells after 24 h of incubation with different concentrations (0  $\mu\text{M}$  - 600  $\mu\text{M}$ ) of CSH- Ag NCs as determined by a MTT assay. The error bars represent the fluctuations among four independent measurements.

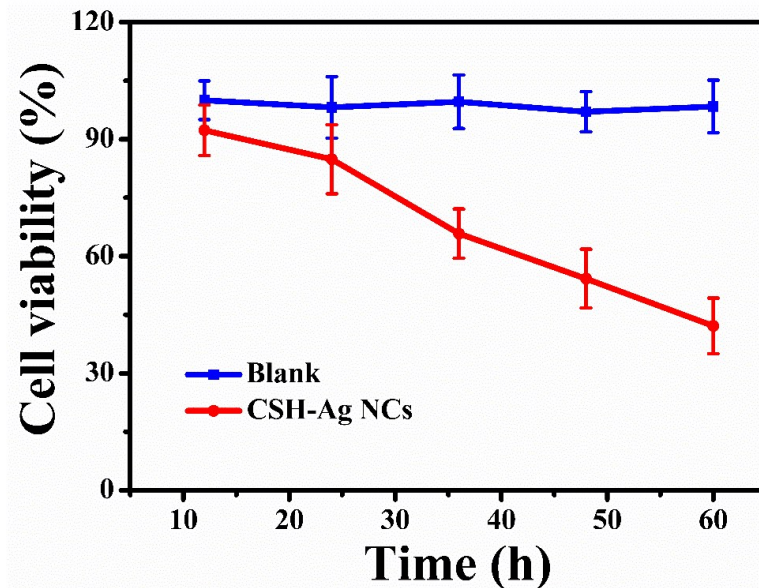

**Figure. S6** Viability of MC-3T3 cells with and without addition of CSH-Ag NCs (50  $\mu\text{M}$ ) after incubation with different time interval (12, 24, 36, 48 and 60 hours) as determined by a MTT assay. The error bars represent the fluctuations among four independent measurements.
